# Supplementary material
Source: Springer Nature journal article supplement (https://www.springermedizin.de/resource/supplementary/13256_2014_2915_MOESM1_ESM.pdf/9650814)
Supplement: MOESM1 [file 9650814]

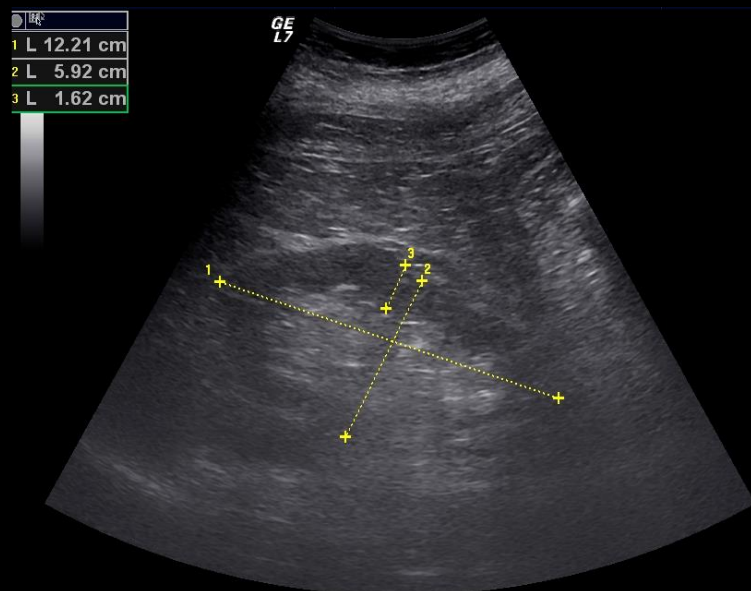

B CHI  
 0- Frq 5.2 MHz  
 - Gn 66  
 - E/A 1/2  
 - SkalaV/0/0  
 D 19.0 cm  
 - DR 72  
 - FR 13 Hz  
 - AO 100 %

|     |         |
|-----|---------|
| 1 L | 9.97 cm |
| 2 L | 5.84 cm |
| 3 L | 1.71 cm |

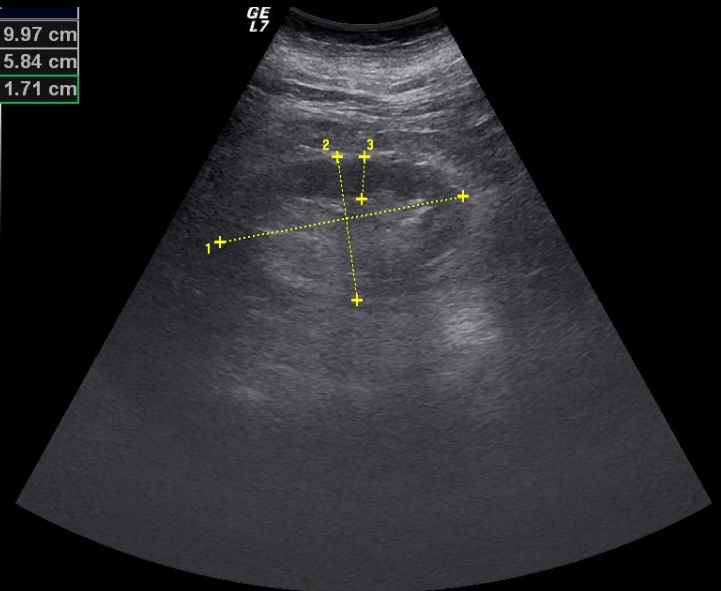

B CHI  
 0- Frq 5.2 MHz  
 - Gn 78  
 - E/A 1/2  
 - SkalaV/0/0  
 D 23.0 cm  
 - DR 72  
 - FR 11 Hz  
 - AO 100 %

Right kidney

Left kidney

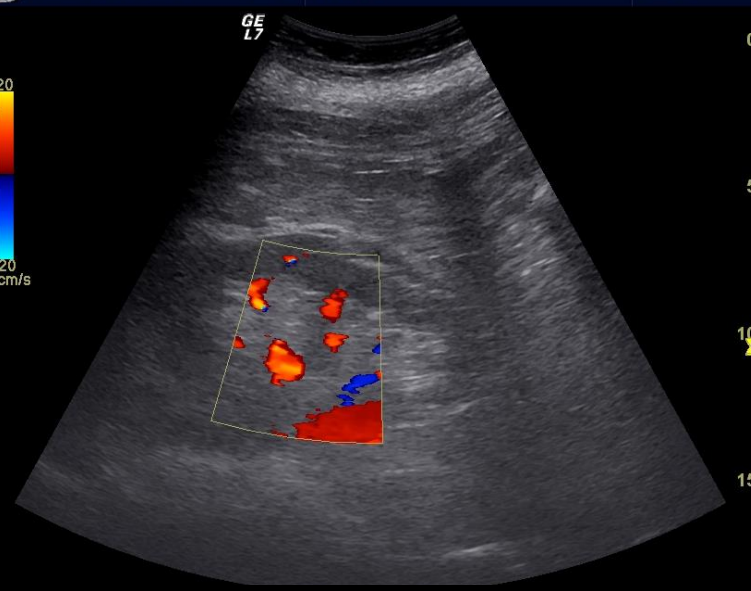

B CHI  
 0- Frq 5.2 MHz  
 - Gn 66  
 - E/A 1/2  
 - SkalaV/0/0  
 D 19.0 cm  
 - DR 72  
 - FR 8 Hz  
 - AO 100 %

CF  
 - Frq 2.0 MHz  
 - Gn 30  
 - L/A 1/4  
 - AO 100 %  
 - PRF 1.0 kHz  
 - WF 169 Hz  
 - S/P 4/12

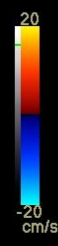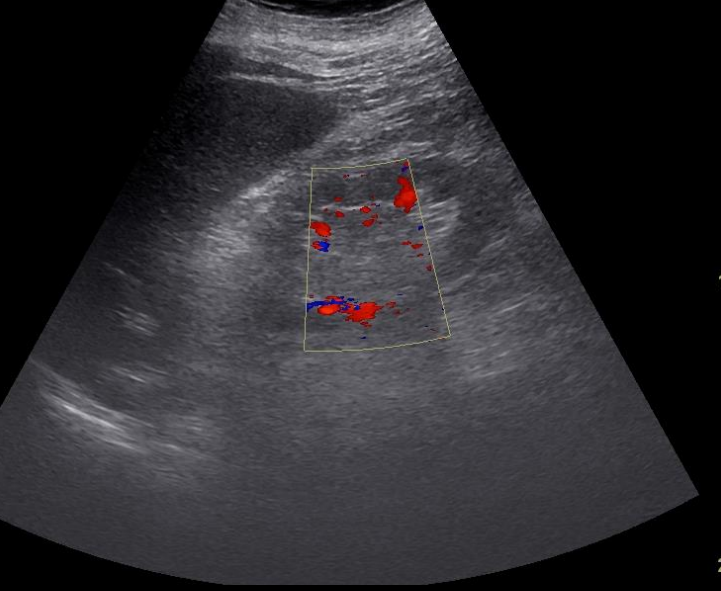

B CHI  
 0- Frq 5.2 MHz  
 - Gn 78  
 - E/A 1/2  
 - SkalaV/0/0  
 D 21.0 cm  
 - DR 72  
 - FR 7 Hz  
 - AO 100 %

CF  
 - Frq 2.0 MHz  
 - Gn 31  
 - L/A 1/4  
 - AO 100 %  
 - PRF 1.0 kHz  
 - WF 169 Hz  
 - S/P 4/12

Right kidney

Left kidney
